# Supplementary material for: Combining Machine Learning and Molecular Simulations to Unlock Gas Separation Potentials of MOF Membranes and MOF/Polymer MMMs
Source: PubMed Central journal article supplement (PMC9305976; doi:10.1021/acsami.2c08977), 2022-07-12
Supplement: am2c08977_si_001.pdf [file am2c08977_si_001.pdf]

## **Supporting Information**

### **Combining Machine Learning and Molecular Simulations to Unlock Gas Separation Potentials of MOF Membranes and MOF/Polymer MMMs**

Hilal Daglar<sup>a</sup> and Seda Keskin<sup>a\*</sup>

<sup>a</sup>Department of Chemical and Biological Engineering, Koc University, Rumelifeneri Yolu, Sariyer, 34450, Istanbul, Turkey

Corresponding author: e-mail: [skeskin@ku.edu.tr](mailto:skeskin@ku.edu.tr), Phone: +90 (212) 338-1362

**Table S1.** Cutoff thresholds.

| Gas Properties                                   | Upper Limit           | Lower Limit           |
|--------------------------------------------------|-----------------------|-----------------------|
| N <sub>He</sub> (mol/kg)                         | 1.55×10 <sup>-1</sup> | 1.02×10 <sup>-2</sup> |
| N <sub>H<sub>2</sub></sub> (mol/kg)              | 2.16×10 <sup>-1</sup> | 1.00×10 <sup>-2</sup> |
| N <sub>CH<sub>4</sub></sub> (mol/kg)             | 3.39                  | 2.19×10 <sup>-2</sup> |
| N <sub>N<sub>2</sub></sub> (mol/kg)              | 3.40                  | 3.00×10 <sup>-2</sup> |
| D <sub>He</sub> (cm <sup>2</sup> /s)             | 4.38×10 <sup>-3</sup> | 1.36×10 <sup>-4</sup> |
| D <sub>H<sub>2</sub></sub> (cm <sup>2</sup> /s)  | 5.40×10 <sup>-3</sup> | 9.07×10 <sup>-5</sup> |
| D <sub>CH<sub>4</sub></sub> (cm <sup>2</sup> /s) | 1.00×10 <sup>-3</sup> | 2.75×10 <sup>-7</sup> |
| D <sub>N<sub>2</sub></sub> (cm <sup>2</sup> /s)  | 1.47×10 <sup>-3</sup> | 9.47×10 <sup>-7</sup> |

**Table S2.** The potential parameters of gas models.

| Atoms                   | Charge (e <sup>-</sup> ) | ε/k <sup>B</sup> (K) | σ (Å) |
|-------------------------|--------------------------|----------------------|-------|
| H <sub>2</sub>          | 0.0                      | 34.2                 | 2.96  |
| He                      | 0.0                      | 10.9                 | 2.64  |
| CH <sub>4</sub>         | 0.0                      | 148.0                | 3.73  |
| O (O <sub>2</sub> )     | -0.113                   | 49.0                 | 3.02  |
| Dummy (O <sub>2</sub> ) | 0.226                    | -                    | -     |
| N (N <sub>2</sub> )     | -0.405                   | 38.298               | 3.31  |
| Dummy (N <sub>2</sub> ) | 0.810                    | -                    | -     |

**Table S3.** Gas permeability of pure polymers.

| Polymers               | Gas Permeability (Barrer) |                |                |                 | Ref. |
|------------------------|---------------------------|----------------|----------------|-----------------|------|
|                        | He                        | H <sub>2</sub> | N <sub>2</sub> | CH <sub>4</sub> |      |
| Polypropylene          | 22.5                      | -              | 0.03617        | 0.00739         | 1    |
| PBOI-2-Cu <sup>+</sup> | -                         | 3.7            | 0.00385417     | -               | 2    |
| HyflonAD60X            | 405                       | 140            | 8.3            | 2.4             | 3    |
| PTMSP-60/40            | -                         | -              | 153            | 80.5            | 4    |
| TeflonAF-2400          | 3600                      | 3396           | 790            | 600             | 5    |
| PTMSP                  | -                         | 23,200         | 9350           | 23,317          | 4    |

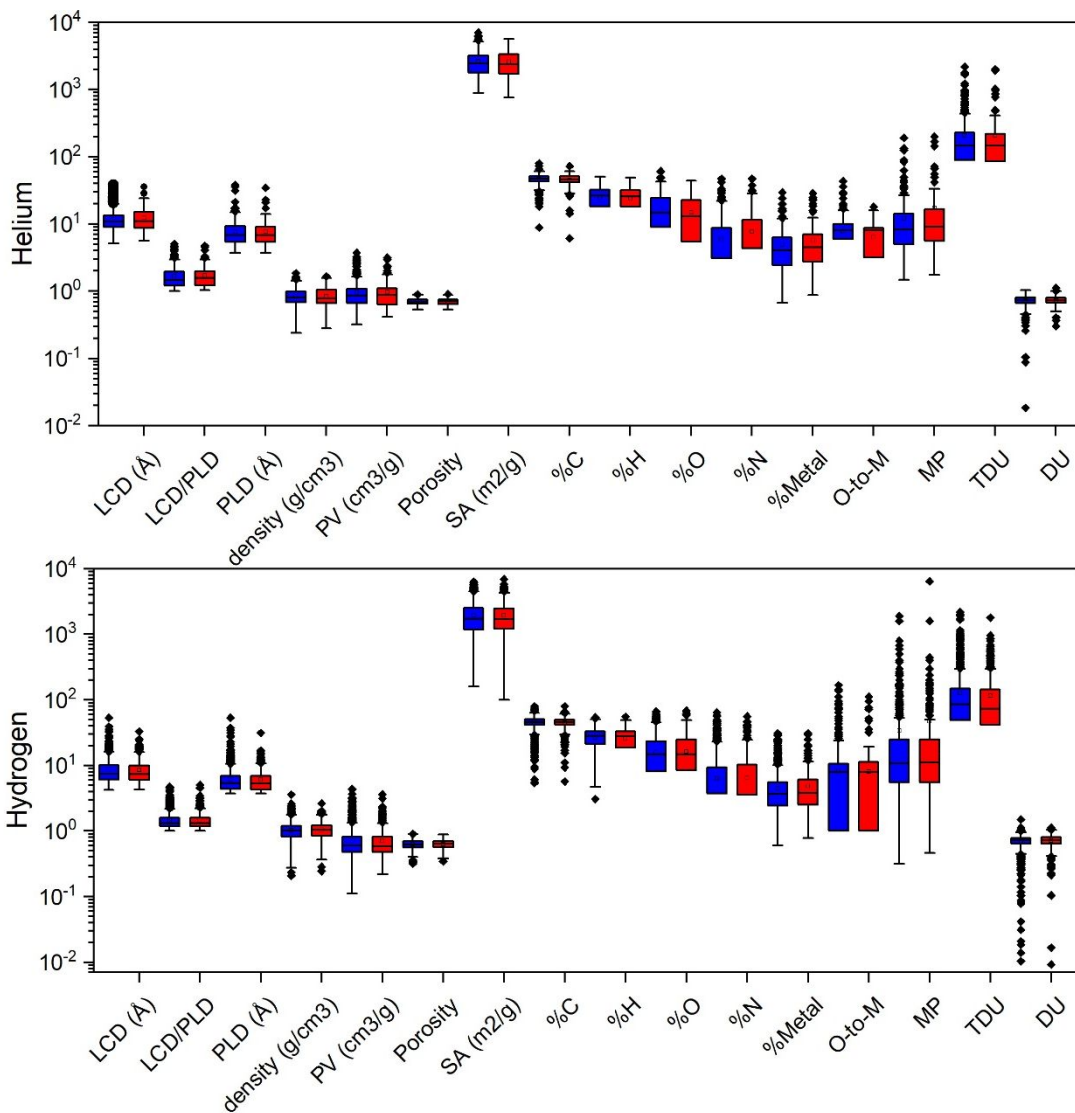

**Figure S1.** Box plots showing the distribution of features based on the training and test set for He and H<sub>2</sub>. Blue (red) represents the training (test) set. Boxes show the quartiles of the dataset, while whiskers extend to show the rest of the distribution, except for the outliers which were defined as values more than 1.5IQR (IQR = interquartile range) from either end of the box.

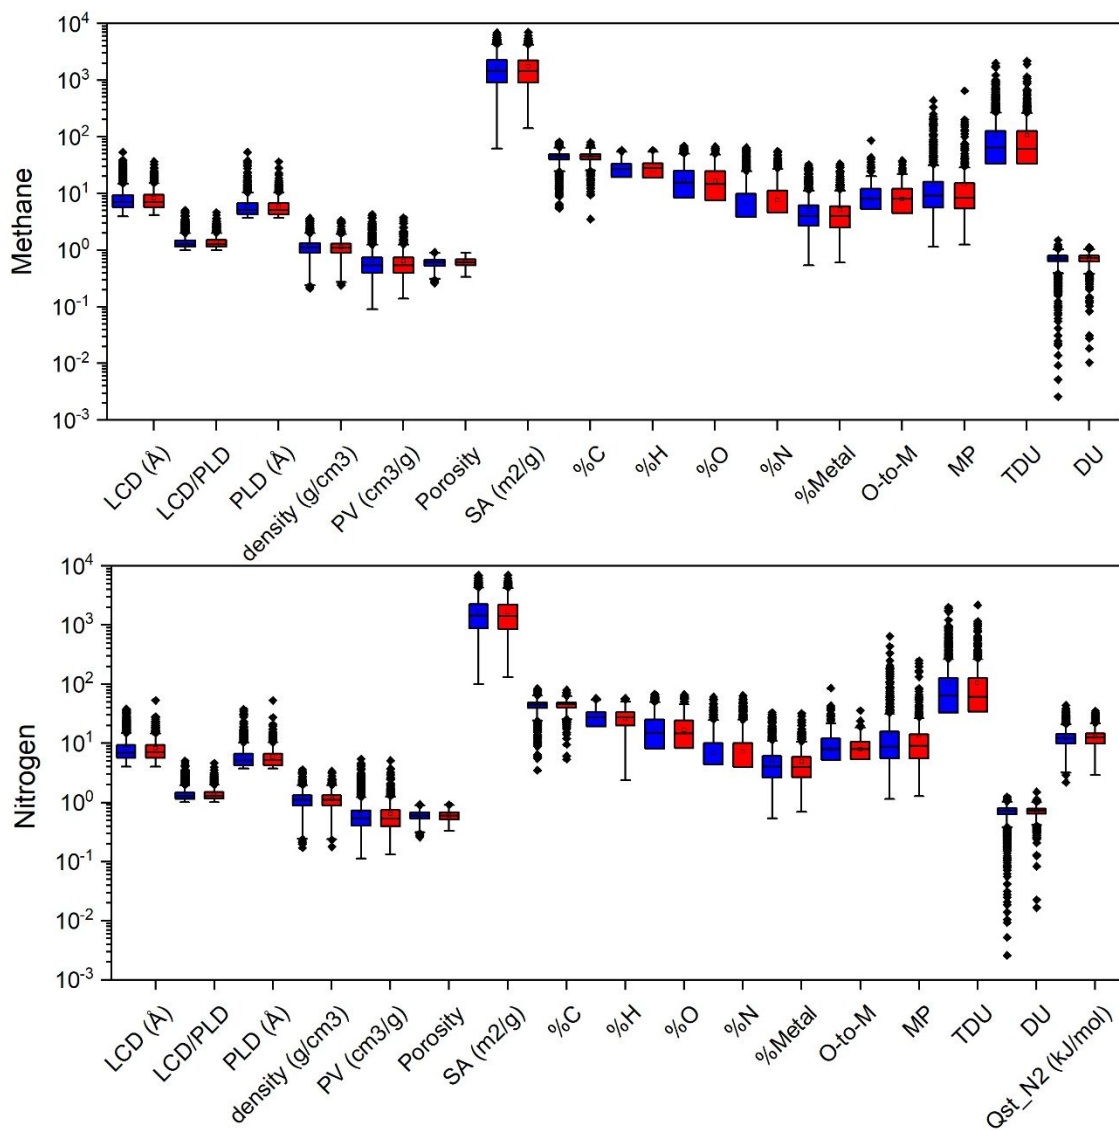

**Figure S2.** Box plots showing the distribution of features based on the training and test set for CH<sub>4</sub> and N<sub>2</sub>. Blue (red) represents the training (test) set. Boxes show the quartiles of the dataset, while whiskers extend to show the rest of the distribution, except for the outliers which were defined as values more than 1.5IQR (IQR = interquartile range) from either end of the box.

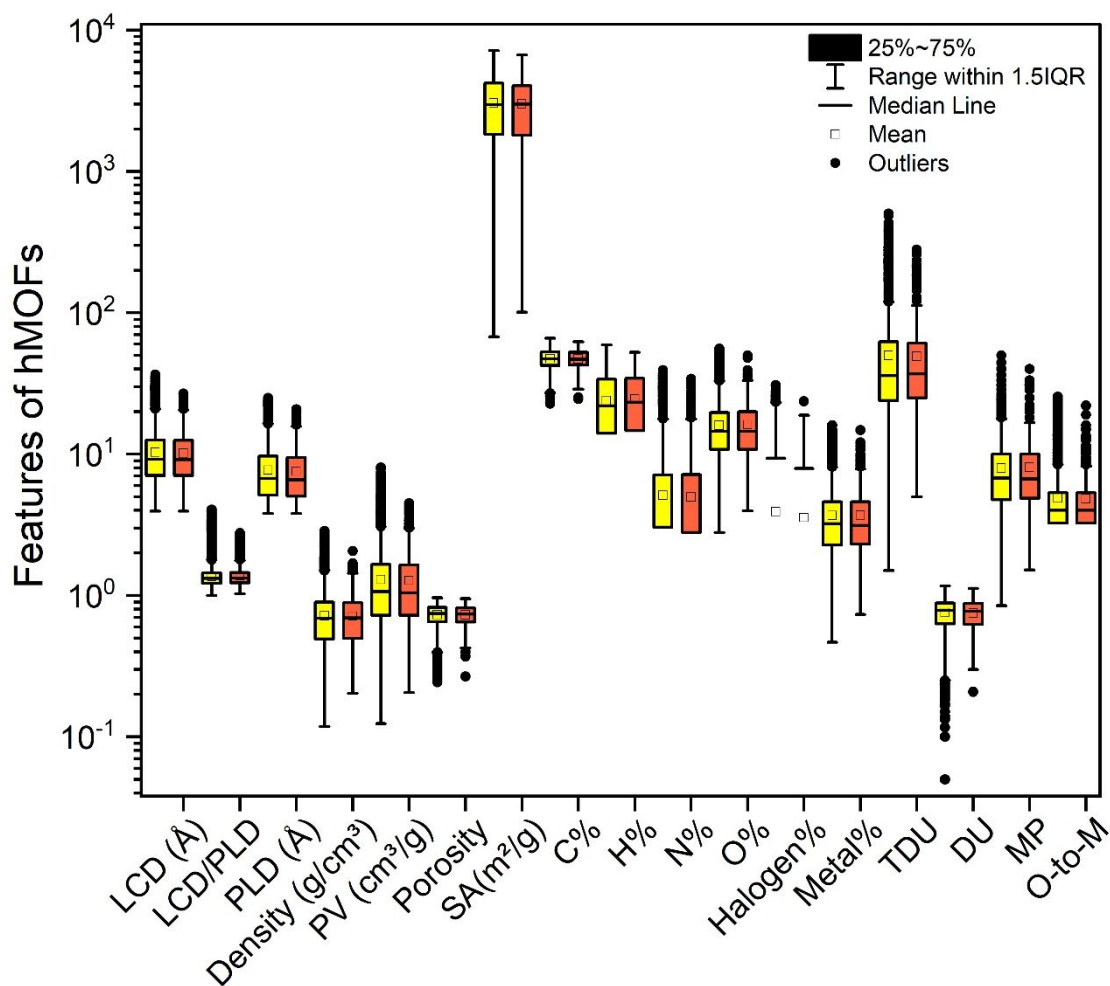

**Figure S3.** Box plots showing the distribution of features based on hMOFs. Yellow and orange symbols represent the curated hMOF set including 102,926 materials and representative hMOF set including 500 materials. Boxes show the quartiles of the dataset, while whiskers extend to show the rest of the distribution, except for points that are determined to be outliers.

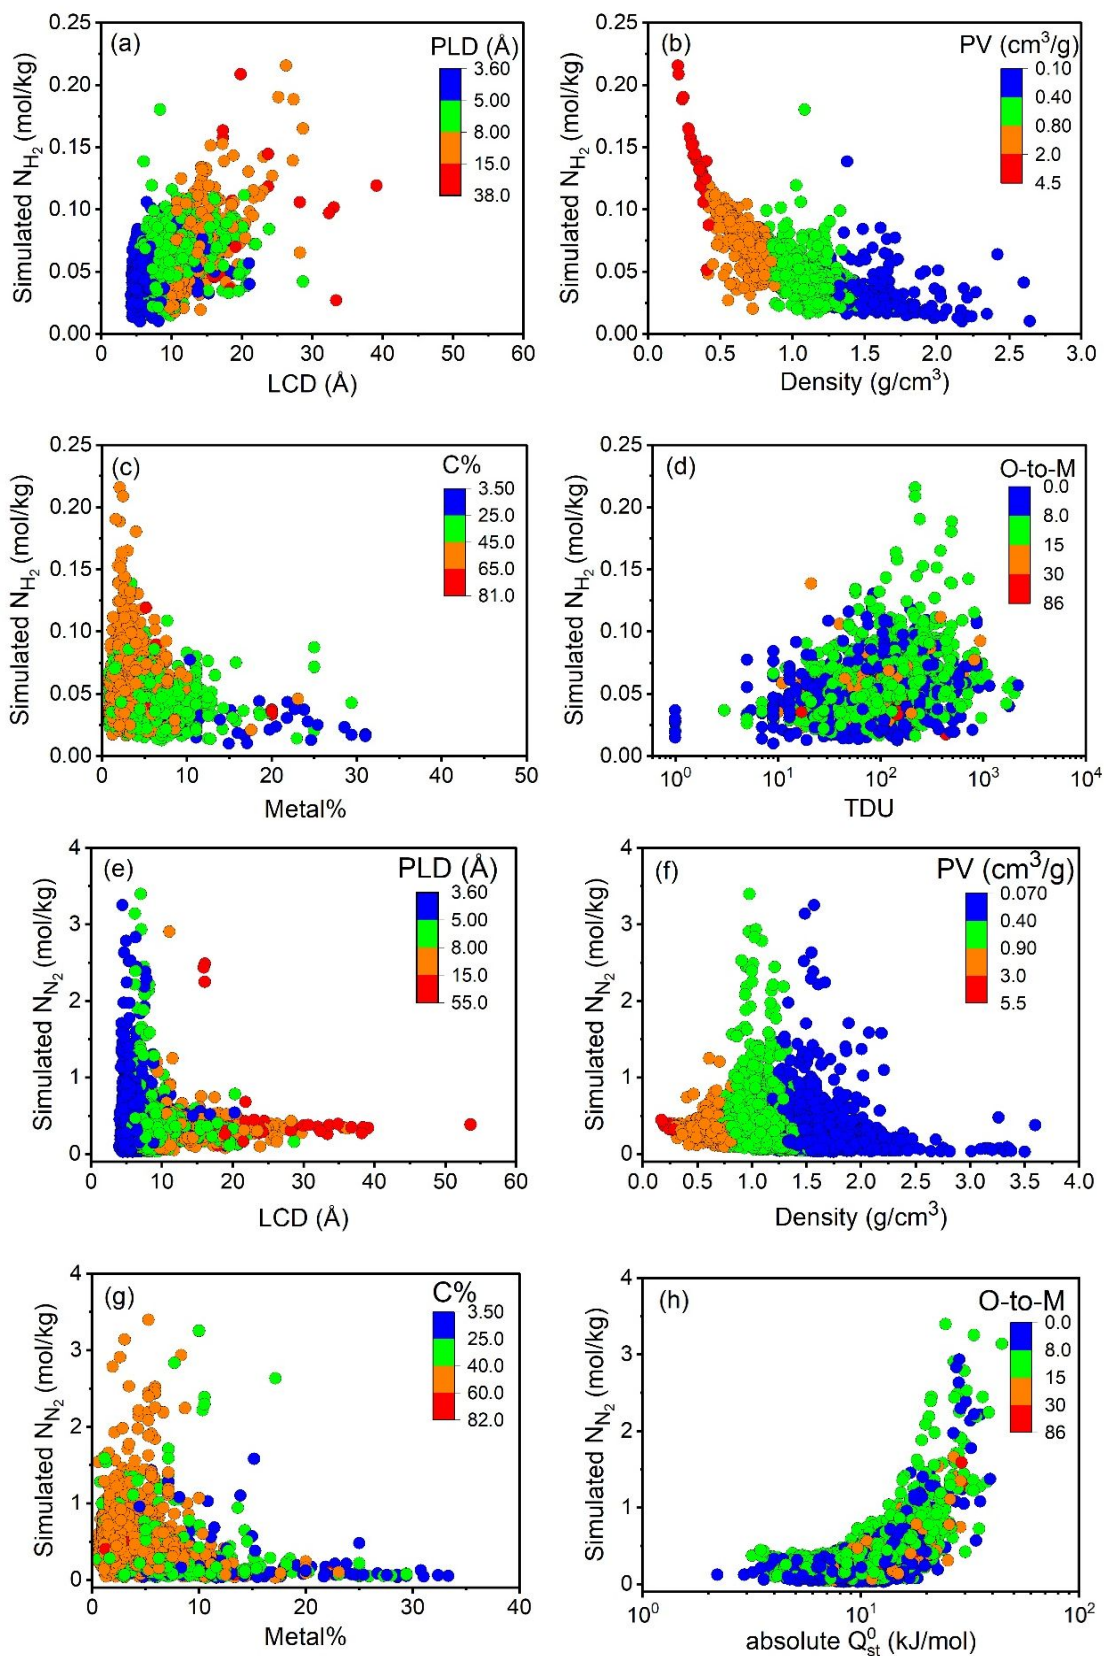

**Figure S4.** The effect of features on gas adsorption: Simulated H<sub>2</sub> and N<sub>2</sub> uptakes of 2715 and 5224 MOFs, respectively, as a function of pore size (LCD, PLD), pore geometry (density, pore volume), atom types (C%, metal%), chemical descriptors (O-to-M, TDU) and energy descriptor (Q<sub>st</sub><sup>0</sup>) in N<sub>2</sub> case.

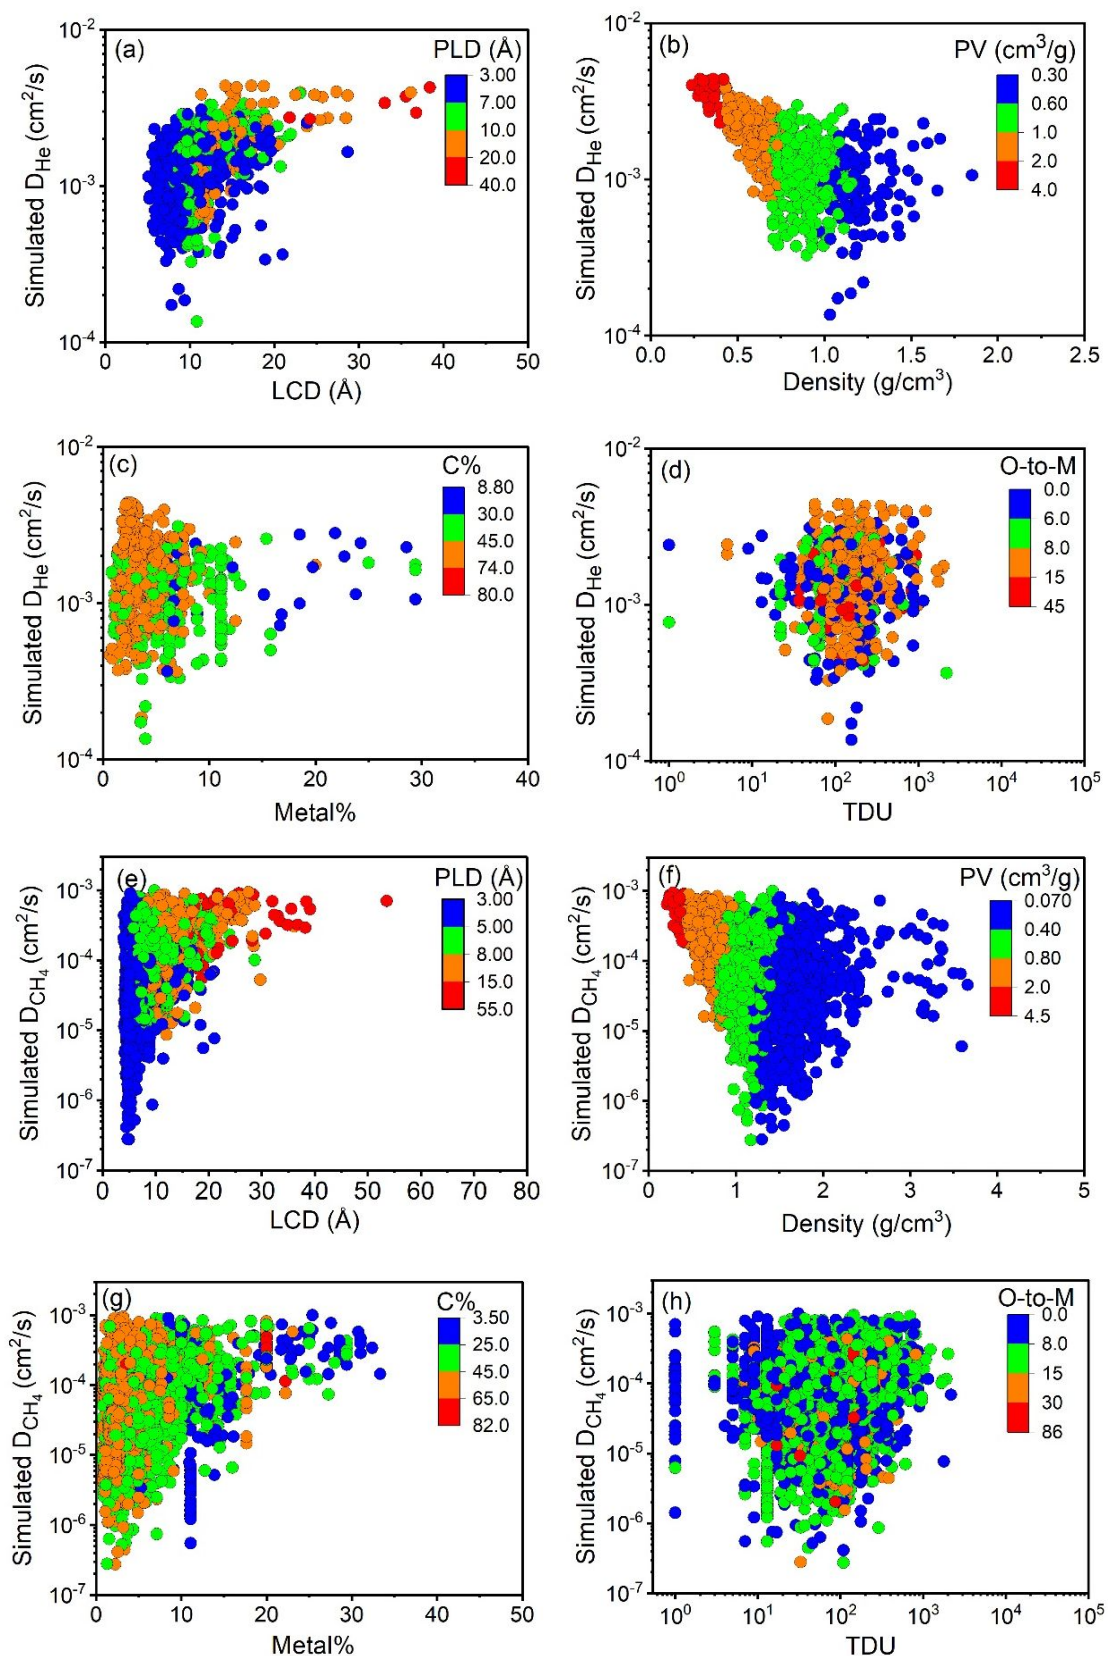

**Figure S5.** The effect of features on gas diffusion: Simulated He and CH<sub>4</sub> diffusivities in 677 and 5215 MOFs, respectively, as a function of pore size (LCD, PLD), pore geometry (density, pore volume), atom types (C%, metal%) and chemical descriptors (O-to-M, TDU).

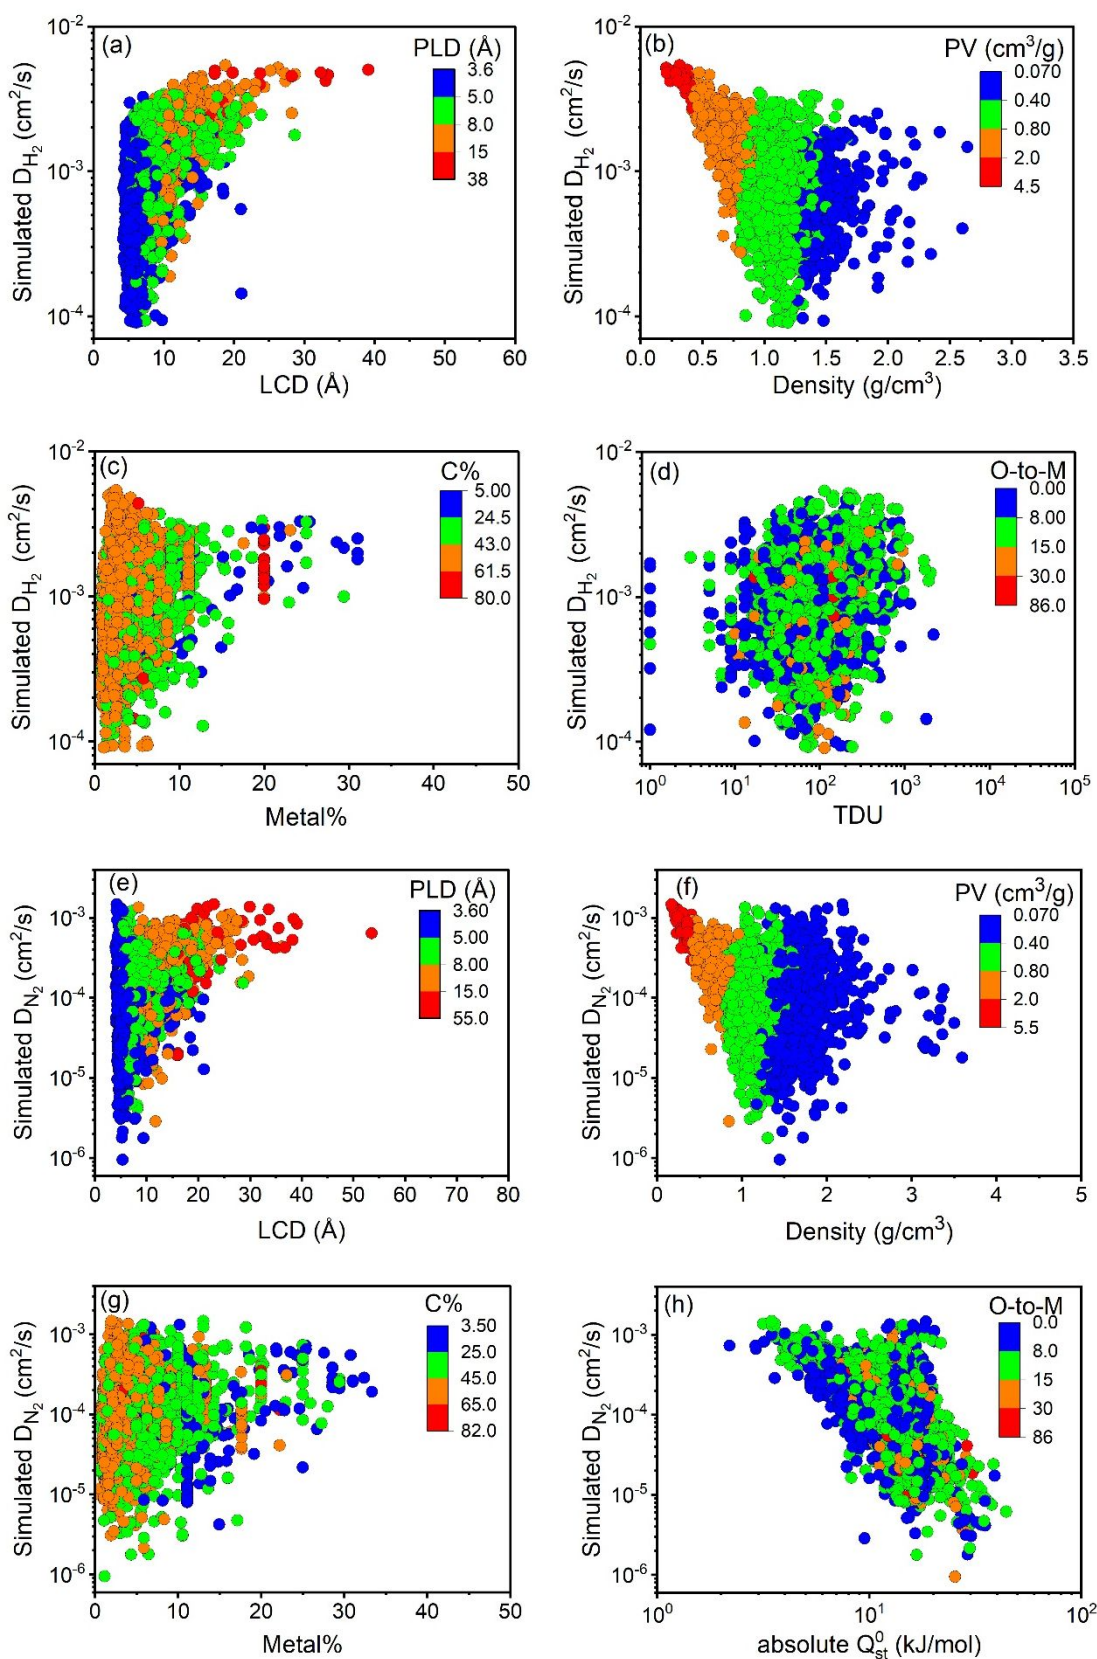

**Figure S6.** The effect of features on gas diffusion: Simulated  $\text{H}_2$  and  $\text{N}_2$  diffusivities in 2715 and 5224 MOFs, respectively, as a function of pore size (LCD, PLD), pore geometry (density, pore volume), atom types (C%, metal%), chemical descriptors (O-to-M, TDU) and energy descriptor ( $Q_{\text{st}}^0$ ) in  $\text{N}_2$  case.



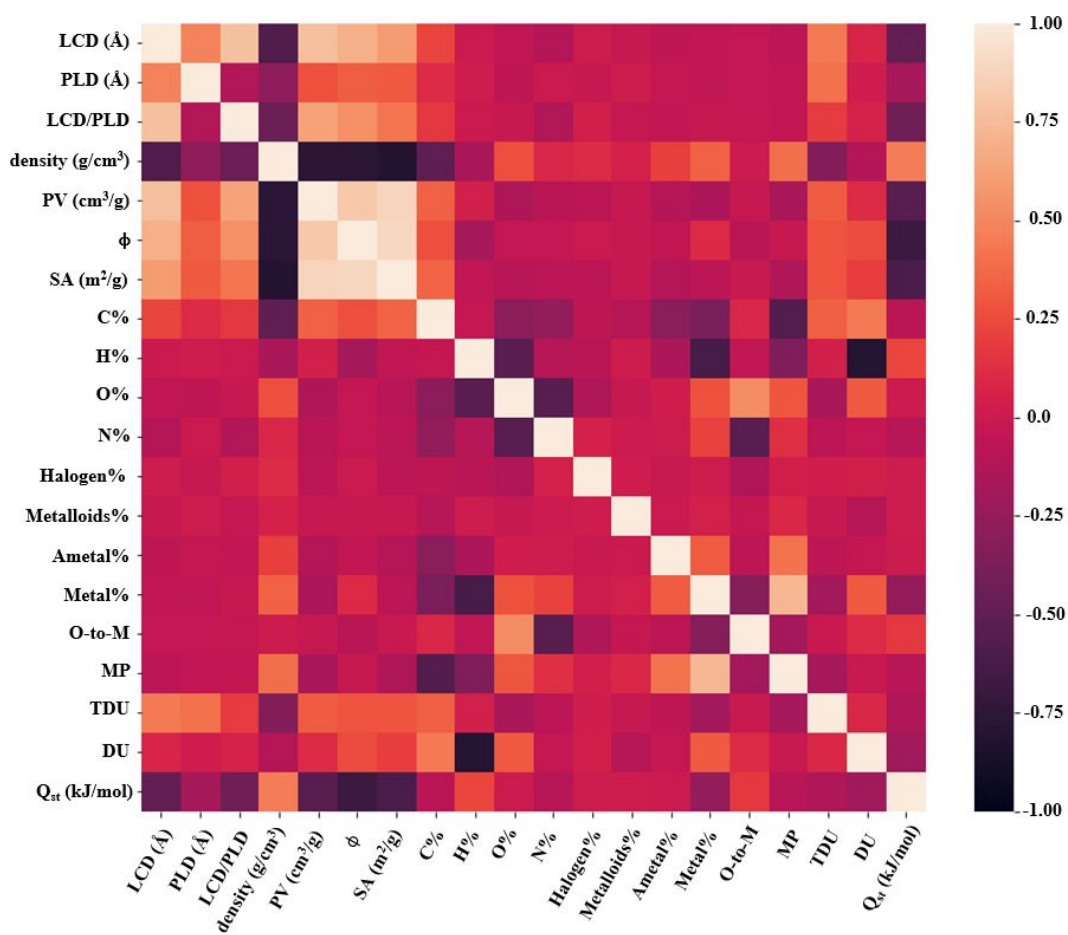

**Figure S7.** Correlation heat map of physical and chemical and energetic features of MOFs.

**Table S4.** The ML pipelines and parameters based on gas adsorption and diffusion properties.

| <b>Property</b>            | <b>Best Pipeline with Parameters</b>                                                                                                                                                                                                            |
|----------------------------|-------------------------------------------------------------------------------------------------------------------------------------------------------------------------------------------------------------------------------------------------|
| He adsorption              | <b>LassoLarsCV</b> (PolynomialFeatures(degree=2, include_bias=False, interaction_only=False), normalize=False))                                                                                                                                 |
| H <sub>2</sub> adsorption  | <b>ExtraTreesRegressor</b> (MaxAbsScaler(), bootstrap=False, max_features=0.55, min_samples_leaf=2, min_samples_split=5, n_estimators=100)                                                                                                      |
| N <sub>2</sub> adsorption  | <b>GradientBoostingRegressor</b> (StackingEstimator(estimator=RidgeCV()), (alpha=0.95, learning_rate=0.1, loss="ls", max_depth=10, max_features=0.1, min_samples_leaf=6, min_samples_split=12, n_estimators=100, subsample=0.9000000000000001)) |
| CH <sub>4</sub> adsorption | <b>ExtraTreesRegressor</b> (PolynomialFeatures(degree=2, include_bias=False, interaction_only=False), bootstrap=False, max_features=0.2, min_samples_leaf=2, min_samples_split=5, n_estimators=100)                                             |
| He diffusion               | <b>ExtraTreesRegressor</b> (PolynomialFeatures(degree=2, include_bias=False, interaction_only=False), bootstrap=False, max_features=0.6000000000000001, min_samples_leaf=9, min_samples_split=19, n_estimators=100)                             |
| H <sub>2</sub> diffusion   | <b>ExtraTreesRegressor</b> (bootstrap=False, max_features=0.55, min_samples_leaf=2, min_samples_split=5, n_estimators=100)                                                                                                                      |
| N <sub>2</sub> diffusion   | <b>GradientBoostingRegressor</b> (alpha=0.95, learning_rate=0.1, loss="ls", max_depth=10, max_features=0.1, min_samples_leaf=6, min_samples_split=12, n_estimators=100, subsample=0.9000000000000001)                                           |
| CH <sub>4</sub> diffusion  | <b>RandomForestRegressor</b> (bootstrap=False, max_features=0.3, min_samples_leaf=3, min_samples_split=6, n_estimators=100)                                                                                                                     |

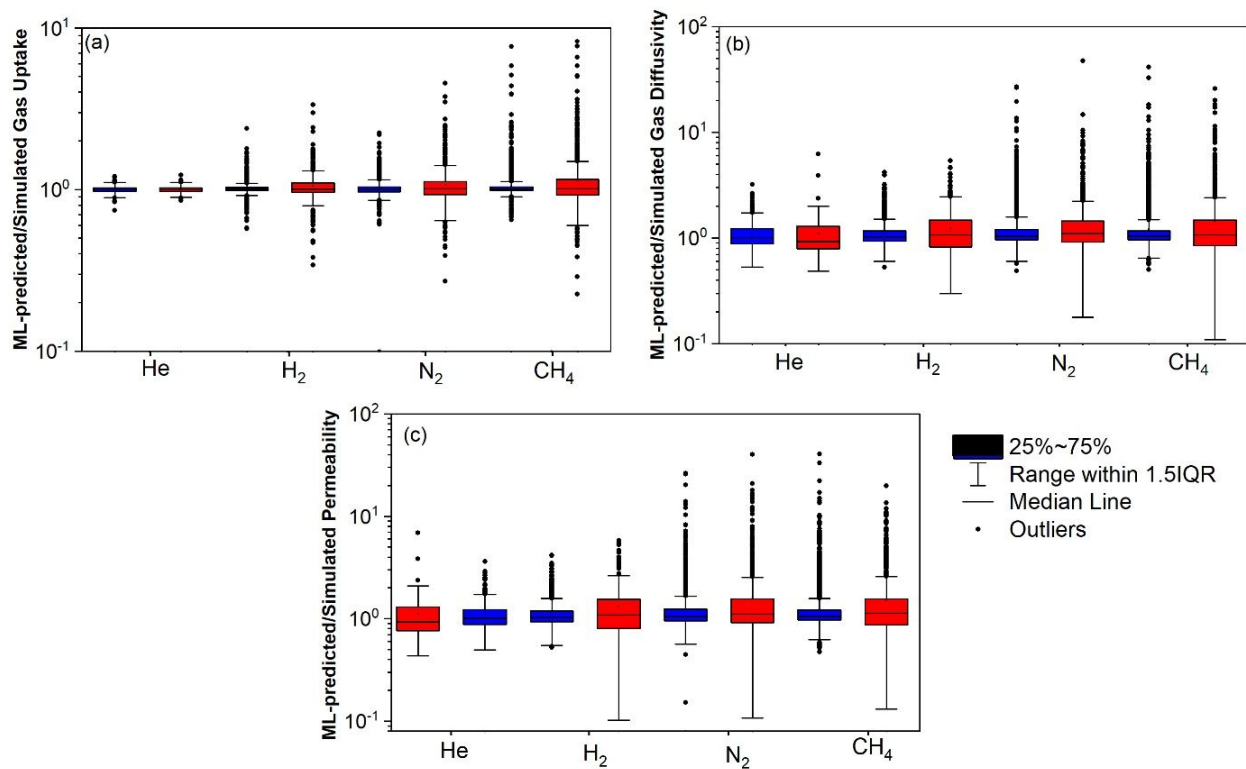

**Figure S8.** The ratio of ML-predicted uptake, diffusivity, and permeability to the simulated ones for He, H<sub>2</sub>, N<sub>2</sub>, and CH<sub>4</sub>. Blue and red boxes represent the training and test set for each gas. Boxes show the quartiles of the dataset, while whiskers extend to show the rest of the distribution, except for points that are determined to be outliers. Outliers are defined as values more than 1.5IQR (IQR = interquartile range) from either end of the box.

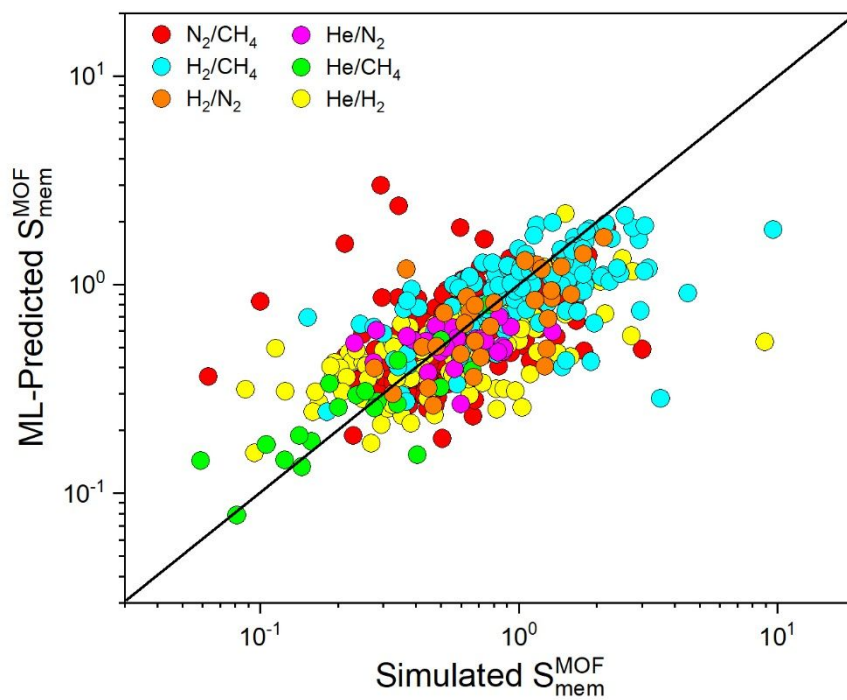

**Figure S9.** Comparison between the ML-predicted and simulated membrane selectivity of MOFs in the test set for He/H<sub>2</sub>, He/N<sub>2</sub>, He/CH<sub>4</sub>, H<sub>2</sub>/CH<sub>4</sub>, H<sub>2</sub>/N<sub>2</sub>, N<sub>2</sub>/CH<sub>4</sub> separations.

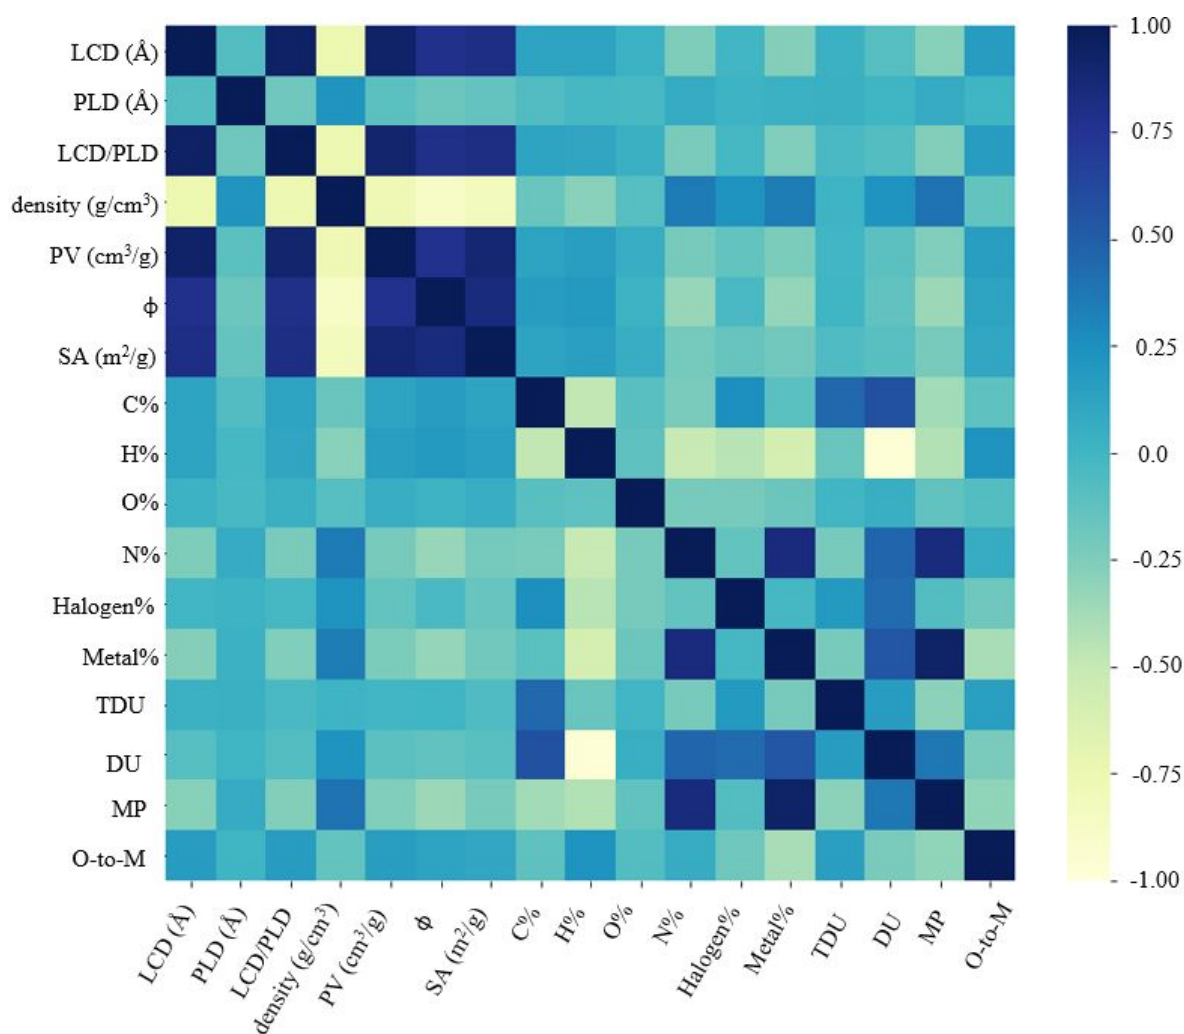

**Figure S10.** Correlation heatmap of the descriptors of hMOFs. Since there are no Metalloids (As, B, Ge, Te, Sb, Si) and Ametal (Se, S, P) groups in hMOFs, figure does not show columns and row corresponding to these atom types.

**Table S5.** MAE, RMSE, SRCC and  $R^2$  of ML-predicted gas uptake and diffusivity in hMOFs in Figure 9(a-d).

| hMOFs                    | RMSE                  | MAE                   | SRCC  | $R^2$ |
|--------------------------|-----------------------|-----------------------|-------|-------|
| He Uptake                | $2.34 \times 10^{-3}$ | $1.80 \times 10^{-3}$ | 0.997 | 0.997 |
| He Diffusion             | $1.17 \times 10^{-3}$ | $6.48 \times 10^{-4}$ | 0.893 | 0.716 |
| H <sub>2</sub> Uptake    | $8.02 \times 10^{-3}$ | $6.24 \times 10^{-3}$ | 0.946 | 0.940 |
| H <sub>2</sub> Diffusion | $1.08 \times 10^{-3}$ | $6.17 \times 10^{-4}$ | 0.897 | 0.738 |

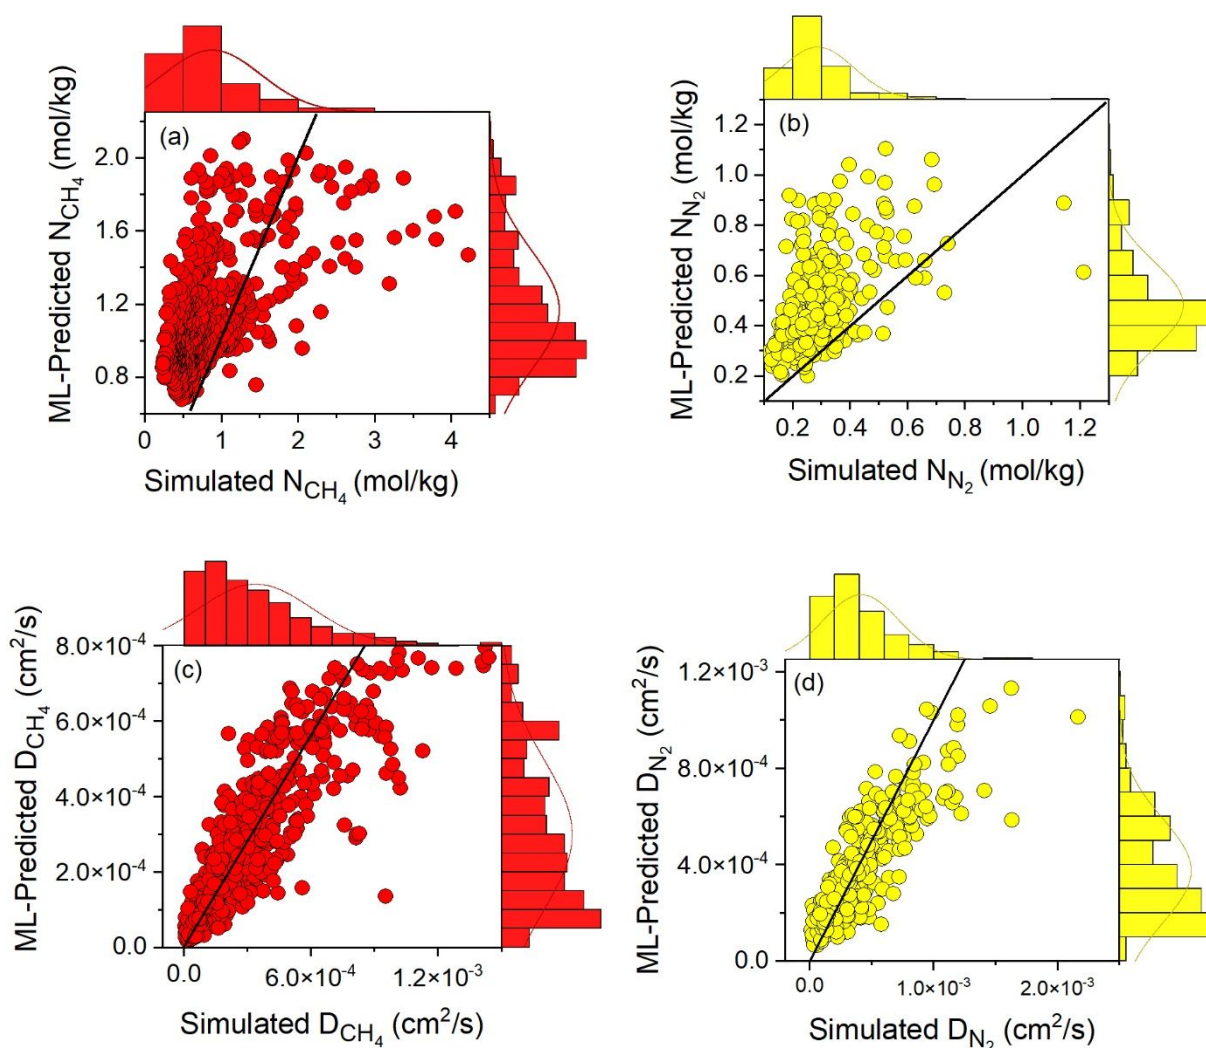

**Figure S11.** The comparison of the ML-predicted (a-b) uptake and (c-d) diffusivity for CH<sub>4</sub> and N<sub>2</sub> gases of unseen 500 hMOFs with the simulated ones. In N<sub>2</sub> case (b, d), we focused on the 350 hMOFs for which partial atomic charges of elements in the framework were assigned to be in the range of -0.5 and 2.

## References

- (1) Zimmerman, C.M.; Koros, W.J. Polypyrrolones for membrane gas separations. I. Structural Comparison of Gas Transport and Sorption Properties, *J. Polym. Sci. B Polym. Phys.*, **1999**, *37*, 1235-1249.
- (2) Polotskaya, G.; Goikhman, M.; Podeshvo, I.; Kudryavtsev, V.; Pientka, Z.; Brozova, L.; Bleha, M. Gas Transport Properties of Polybenzoxazinoneimides and Their Prepolymers, *Polymer*, **2005**, *46*, 3730-3736.
- (3) Macchione, M.; Jansen, J.C.; De Luca, G.; Tocci, E.; Longeri, M.; Drioli, E. Experimental Analysis and Simulation of the Gas Transport in Dense Hyflon® AD60X Membranes: Influence of Residual Solvent, *Polymer*, **2007**, *48*, 2619-2635.
- (4) Nagai, K.; Higuchi, A.; Nakagawa, T. Gas Permeability and Stability of Poly (1-trimethylsilyl-1-propyne-co-1-phenyl-1-propyne) Membranes, *J. Polym. Sci. B Polym. Phys.*, **1995**, *33*, 289-298.
- (5) Pinnau, I.; Toy, L.G. Gas and Vapor Transport Properties of Amorphous Perfluorinated Copolymer Membranes based on 2, 2-bis(trifluoromethyl)-4, 5-difluoro-1, 3-dioxole/tetrafluoroethylene, *J. Membr. Sci.*, **1996**, *109*, 125-133.
